# Supplementary material for: Influence of Maleinized Polybutadiene on Adhesive Strength and Toughness of Epoxy Resins
Source: Hindawi journal article supplement (doi:10.1155/2022/9517467), 2022-12-28
Supplement: f1 [file 9517467.f1.docx]

**Influence of Maleinized Polybutadiene on Adhesive Strength and Toughness of Epoxy Resins**

Mohammed Panthakkal Abdul Muthalif a, Youngson Choe*a

aDepartment of Polymer Science and Chemical Engineering, Pusan National University, Geumjeong-gu, Jangjeong-Dong, Busan 46241, South Korea

*Corresponding author. <Tel:+82515102396>; fax: +82515128634

E-mail: [choe@pusan.ac.kr](mailto:choe@pusan.ac.kr)

**Table S1** Lap shear strength values of the MPB-modified epoxy samples

| Samples | Lap shear  Strength (MPa) | Samples | Lap Shear Strength (MPa) |
| --- | --- | --- | --- |
| Neat Epoxy | 22.43 | Neat Epoxy | 22.43 |
| E/C/M (3.1K, 5phr) | 34.88 | E/C/M (5.6K, 5phr) | 37.72 |
| E/C/M (3.1K, 10phr) | 40.60 | E/C/M (5.6 K, 10phr) | 35.04 |
| E/C/M (3.1K, 15phr) | 36.08 | E/C/M (5.6K, 15phr) | 33.95 |

**Table S2** T-peel strength values of the MPB-modified epoxy samples

| Samples | T-peel  Strength (N/25mm) | Samples | T-peel  Strength (N/25mm) |
| --- | --- | --- | --- |
| Neat Epoxy | 125.05 | Neat Epoxy | 125.05 |
| E/C/M (3.1K, 5phr) | 240.81 | E/C/M (5.6K, 5phr) | 190.42 |
| E/C/M (3.1K, 10phr) | 213.20 | E/C/M (5.6 K, 10phr) | 195.83 |
| E/C/M (3.1K, 15phr) | 237.38 | E/C/M (5.6K, 15phr) | 184.31 |
